# Supplementary material
Source: PubMed Central journal article supplement (PMC4860904)

FIGURE 1

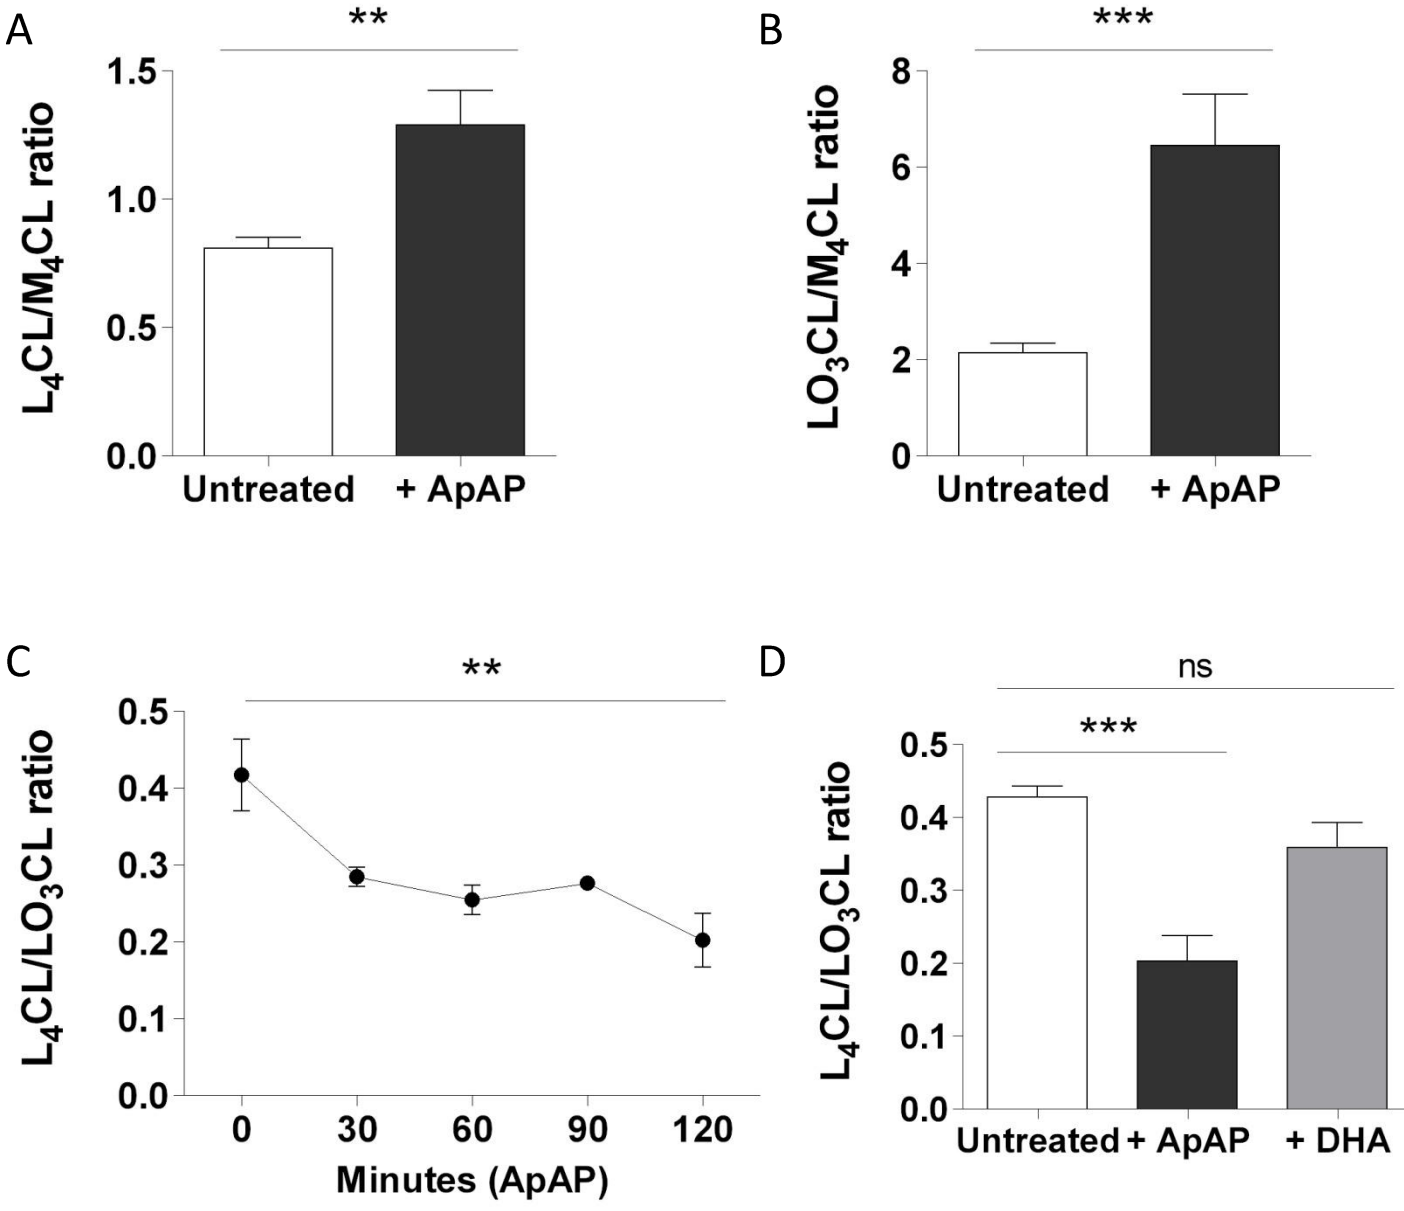

FIGURE 2

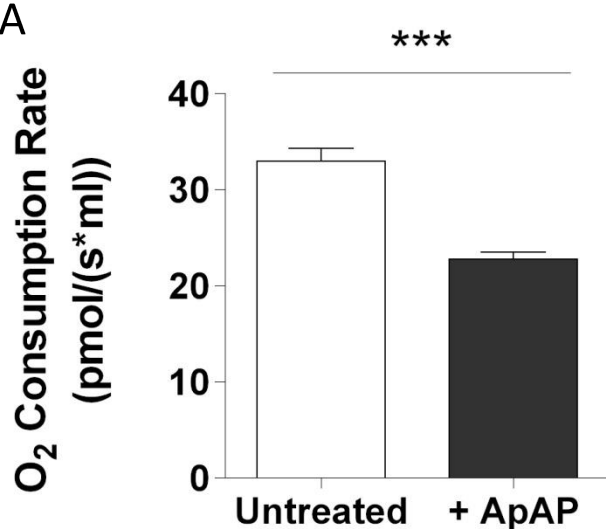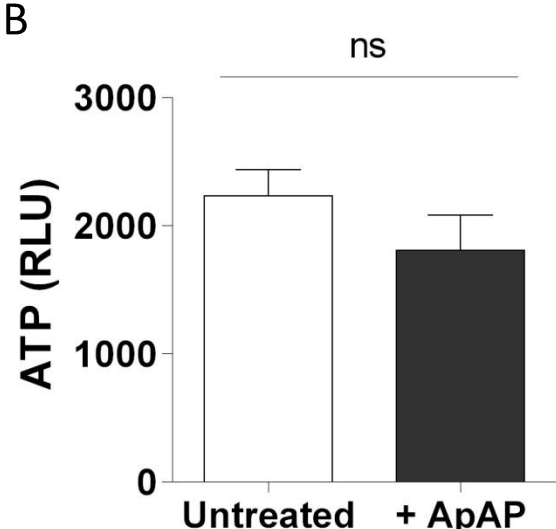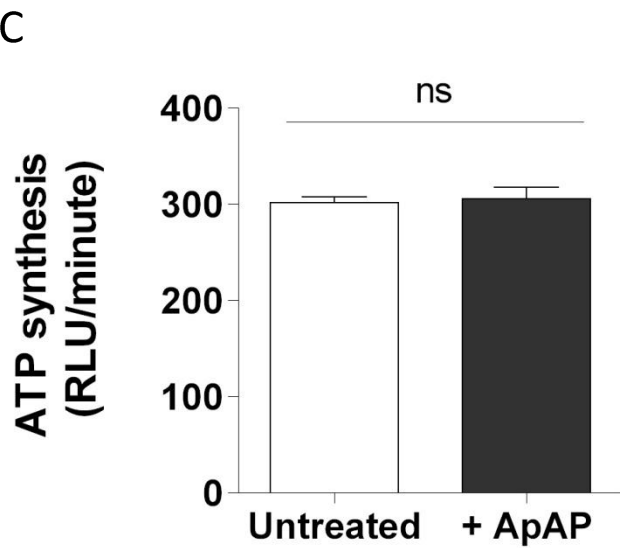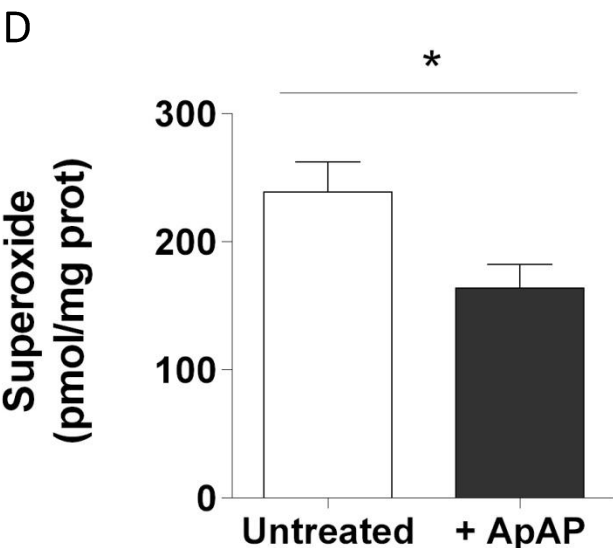

FIGURE 3

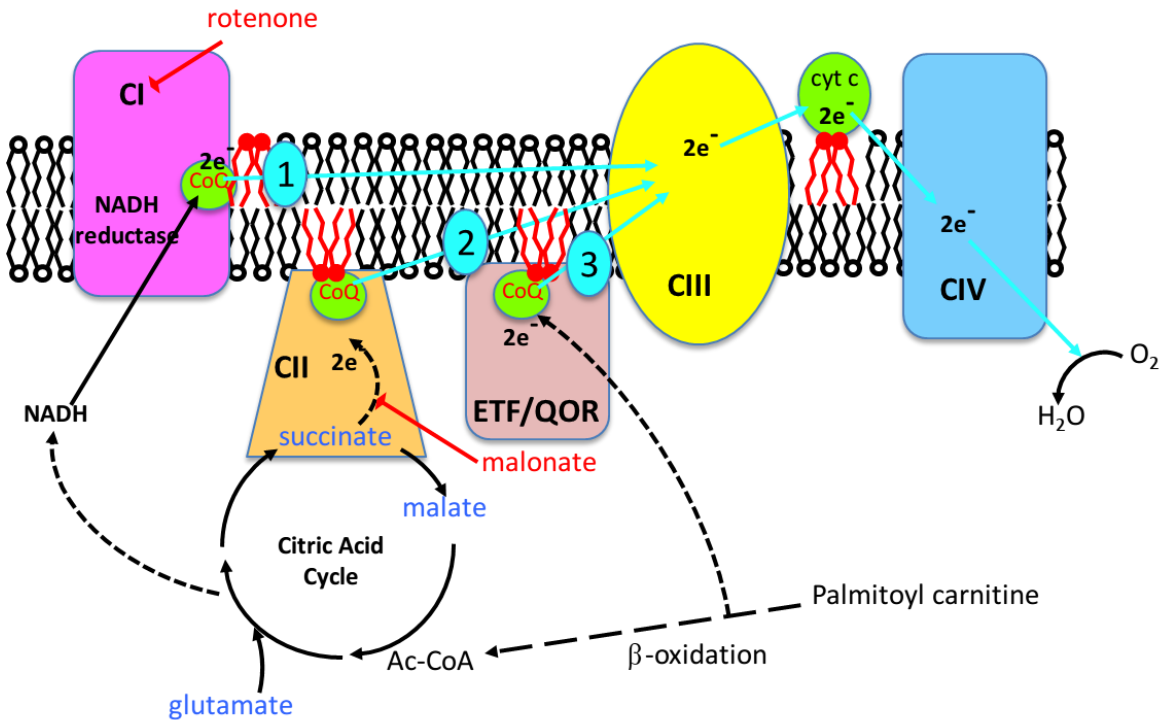

FIGURE 4

A

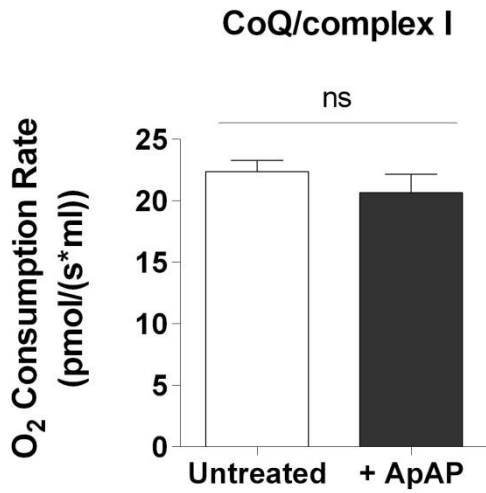

B

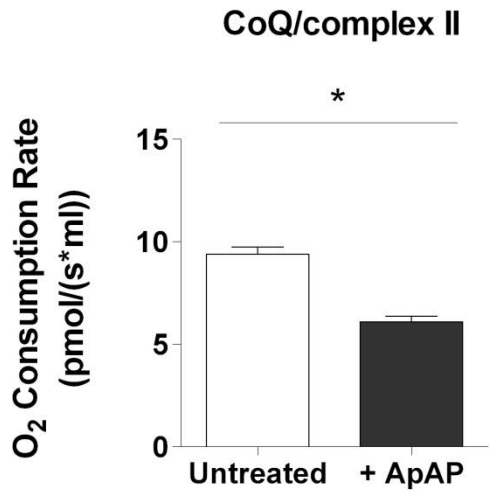

C

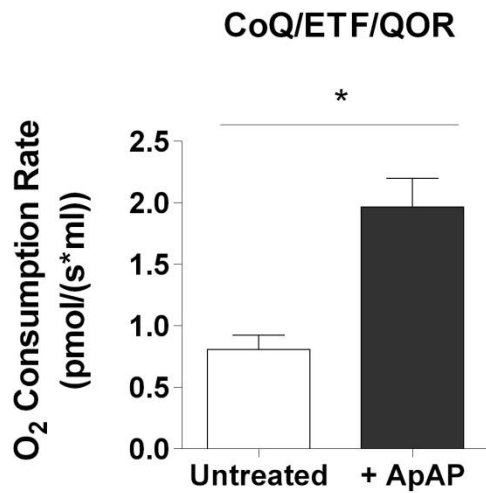

D

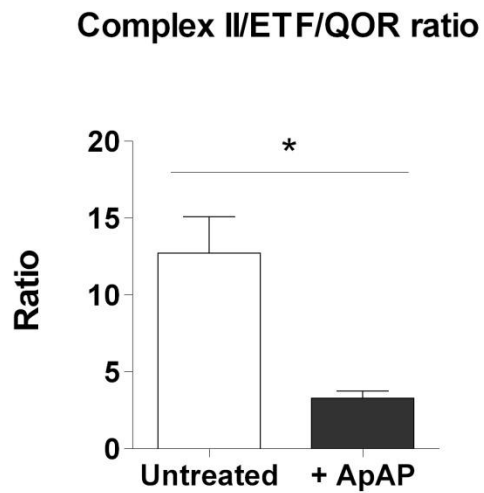

FIGURE 5

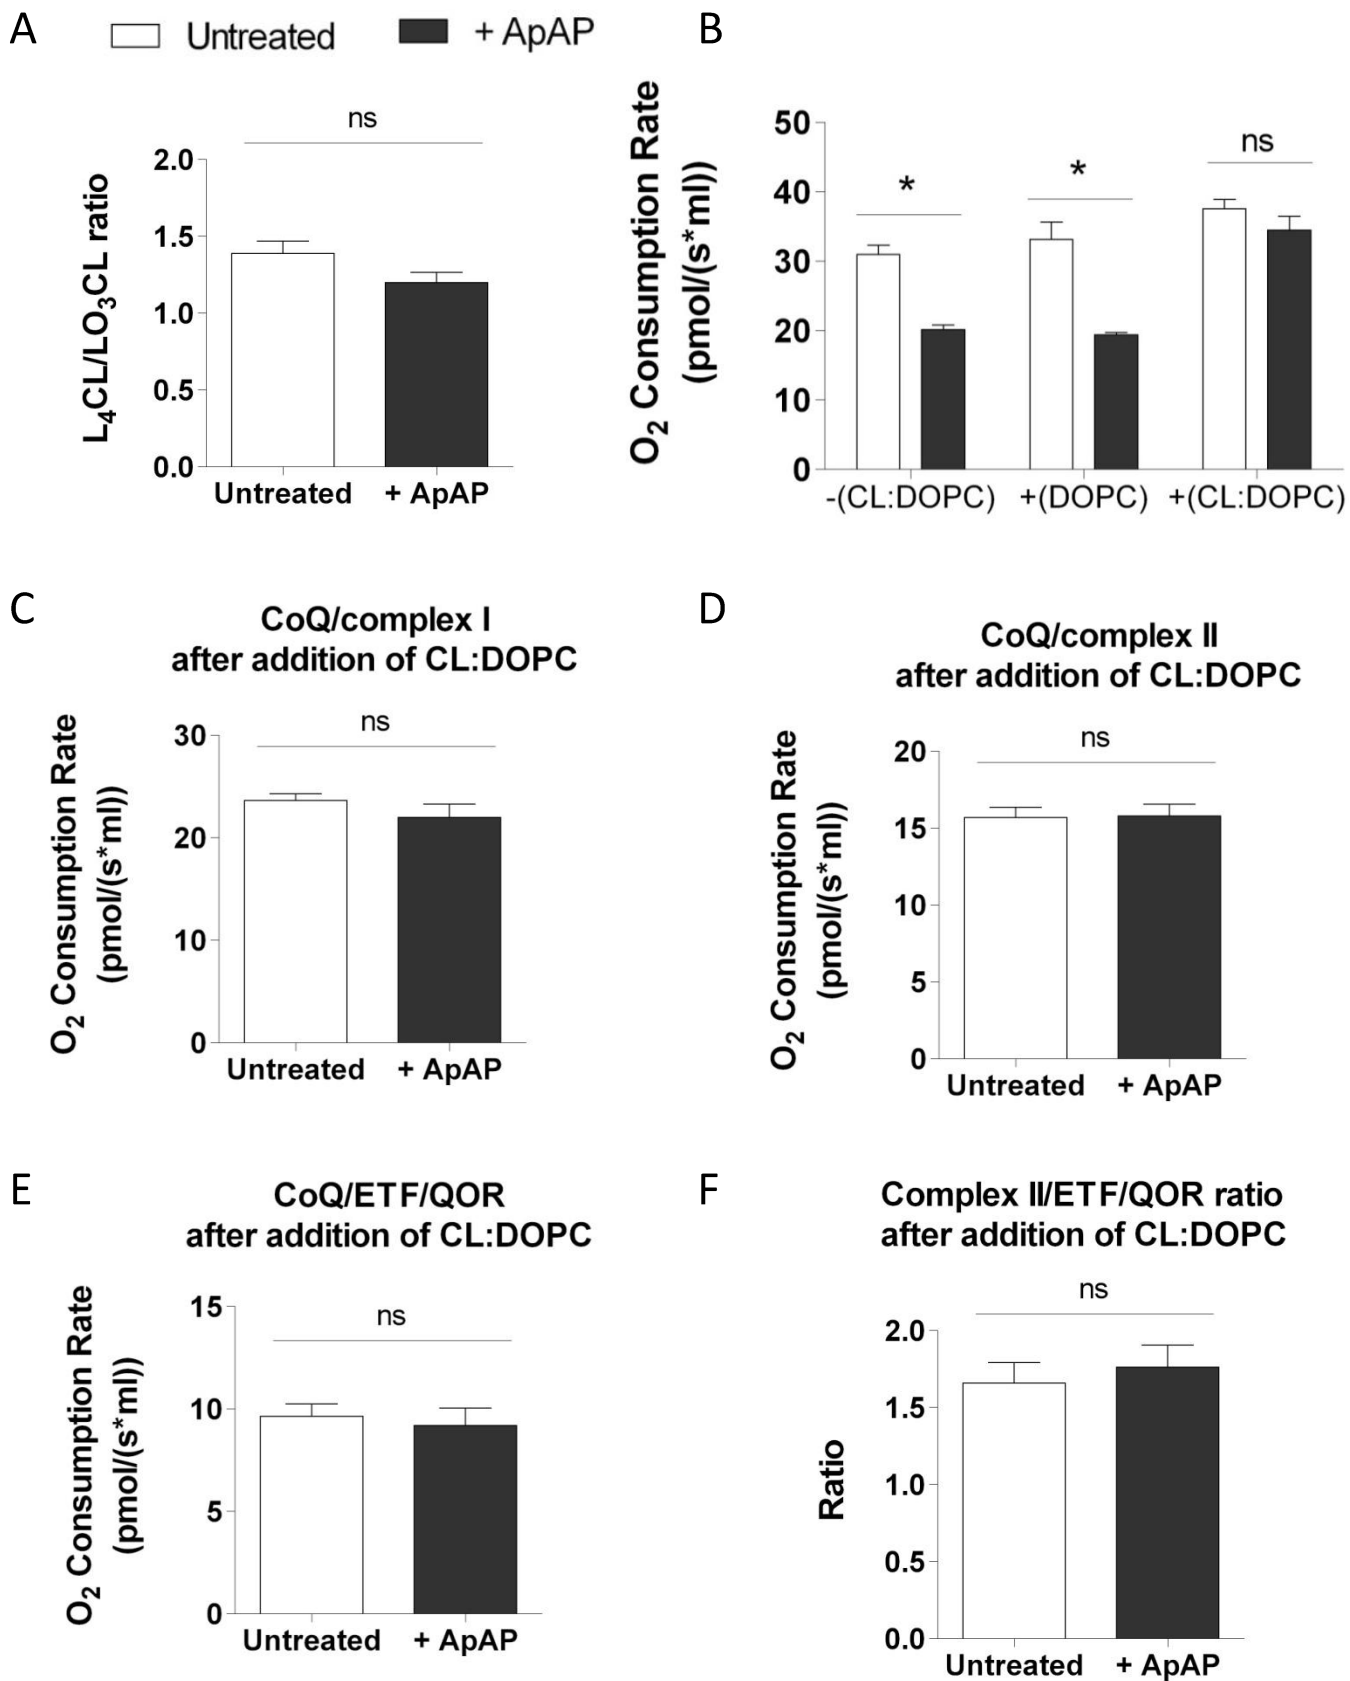

# SUPPLEMENTARY FIGURE S1

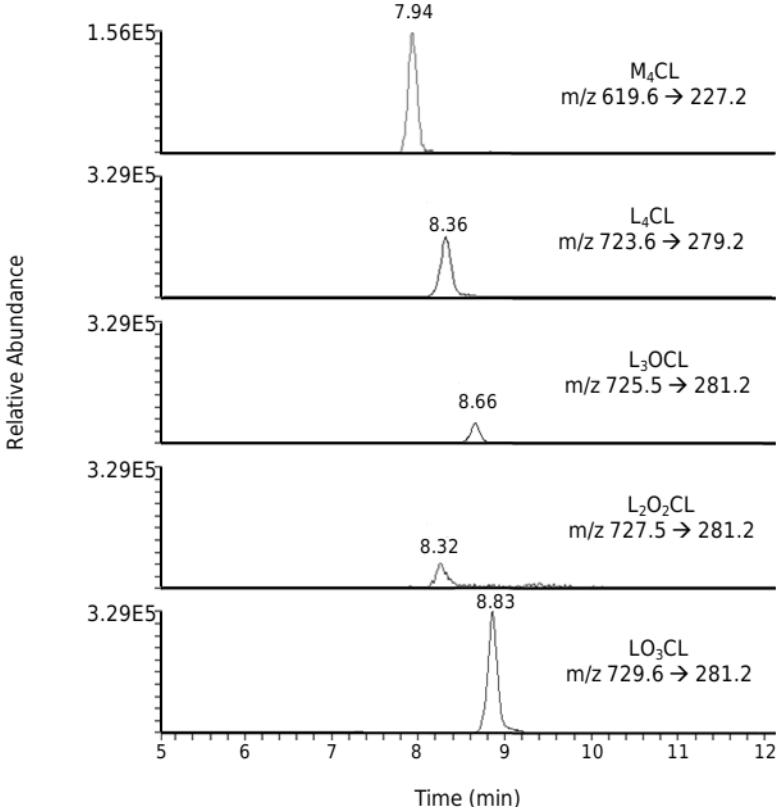

# SUPPLEMENTARY FIGURE S2

Mitochondrial L<sub>4</sub>CL/M<sub>4</sub>CL ratio after addition of CL:DOPC

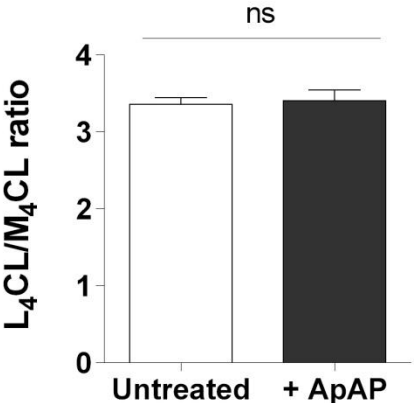

Mitochondrial LO<sub>3</sub>CL/M<sub>4</sub>CL ratio after addition of CL:DOPC

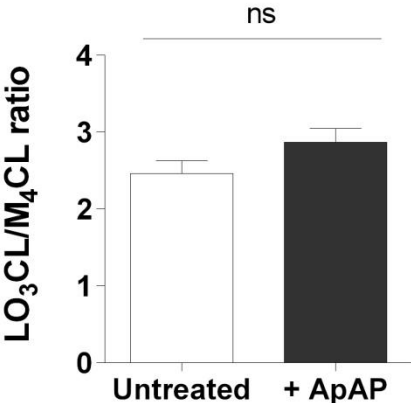

Supplement: NIHMS781875-supplement.pdf [file NIHMS781875-supplement.pdf]
